# Supplementary material
Source: HighWire-hosted journal article supplement (https://erj.ersjournals.com/highwire/filestream/131029/field_highwire_adjunct_files/1/ERJ-02049-2015_Appendix_2.pdf)
Supplement: ERJ-02049-2015_Appendix_2.pdf [file ERJ-02049-2015_Appendix_2.pdf]

Appendix 2. MEDLINE search strategy for lung cancer outcomes and case-mix measures

| Search terms                                                                                                                                                                                                                                                                                                                                                                                                                                                                                                                                                                                                                                                                                                                                                                                                                                            | Results |
|---------------------------------------------------------------------------------------------------------------------------------------------------------------------------------------------------------------------------------------------------------------------------------------------------------------------------------------------------------------------------------------------------------------------------------------------------------------------------------------------------------------------------------------------------------------------------------------------------------------------------------------------------------------------------------------------------------------------------------------------------------------------------------------------------------------------------------------------------------|---------|
| <b>#1</b> Search "lung neoplasms"[MeSH Terms] AND (randomized controlled trial[All Fields] OR randomized controlled trials[All Fields] OR randomised controlled trial[All Fields] OR randomised controlled trials[All Fields] OR randomized controlled trial[Publication Type] OR Review[ptyp] OR systematic[sb]) AND ("Quality of Life"[Mesh] OR "Quality Indicators, Health Care"[Mesh] OR "Patient Outcome Assessment"[Mesh] OR patient reported outcome*[tiab] OR patient related outcome*[tiab] OR patient-reported outcome*[tiab] OR patient-related outcome*[tiab] OR patient reported outcome*[ot] OR patient related outcome*[ot] OR patient-reported outcome*[ot] OR patient-related outcome*[ot] OR "Treatment Outcome"[Mesh]) AND ("2005/01/01"[PDAT] : "3000/12/31"[PDAT]) Filters: Clinical Trial; published in the last 10 years; Humans | 840     |
| <b>#2</b> #1 AND English[lang]                                                                                                                                                                                                                                                                                                                                                                                                                                                                                                                                                                                                                                                                                                                                                                                                                          | 770     |
| <b>#3</b> Remove duplicates                                                                                                                                                                                                                                                                                                                                                                                                                                                                                                                                                                                                                                                                                                                                                                                                                             | 716     |
| <b>#4</b> Remove studies not meeting criteria (108 excluded in total) <ul style="list-style-type: none"> <li>• 61 studies on other primary cancers besides lung cancer, including lung metastases.</li> <li>• 11 studies focused on molecular or histologic findings.</li> <li>• 9 studies reporting outcomes of screening or prevention of lung cancer.</li> <li>• 9 studies focused on surgical technique or air leak management.</li> <li>• 4 studies on benign lung nodules.</li> <li>• 4 studies consisting of cost-effectiveness analysis only.</li> <li>• 4 studies on lung cancer biomarkers.</li> <li>• 3 studies on lung cancer imaging.</li> <li>• 3 other studies outside of the scope of this work (SBRT technical considerations, bone turnover with bone metastases, quality of life research methods).</li> </ul>                       | 608     |
